# Supplementary material for: Genome-Wide Identification of Regulatory Elements and Reconstruction of Gene Regulatory Networks of the Green Alga Chlamydomonas reinhardtii under Carbon Deprivation
Source: PLoS One. 2013 Nov 1;8(11):e79909. doi: 10.1371/journal.pone.0079909 (PMC3816576; doi:10.1371/journal.pone.0079909)
Supplement: Table S3 — TF and TR genes showing an expression fold change larger than 2. Excel file listing TF and TR genes showing an expression fold change larger than 2 in at least one experimental time point. Protein ID, transcript ID, gene family name, cluster ID and gene expression fold change (FC) for time points corresponding to 60, 120 and 180 min after the shift from HC to LC condition are given. Expression values ± SD from five biological replicates are shown. (XLS) [file pone.0079909.s003.xls]

## Sheet: Table S3
Table S3. TF and TR genes showing an expression fold change larger than 2.
Protein ID*	Transcript ID*	Gene family	Cluster ID	FC 1h	FC 2h	FC 3h
6783	fgenesh1_pg.C_scaffold_7000334	SNF2	6	0.845556	5.89144	0.714435
8155	fgenesh1_pg.C_scaffold_6000122	DDT	7	8.65844	3.03645	ND
19751	fgenesh1_pg.C_scaffold_52000016	AP2-EREBP	2	0.814569	0.479193	1.33831
22211	fgenesh1_pg.C_scaffold_94000028	C3H	9	0.397935	0.423821	0.601554
75247	gwW.45.133.1	AP2-EREBP	2	0.874854	0.4792	1.03713
93505	fgenesh1_est.C_scaffold_5000041	SBP	1	1.55718	1.06054	0.393198
95196	fgenesh1_est.C_scaffold_28000028	bZIP	4	0.28552	0.704606	0.211916
101275	e_gwH.16.88.1	CCAAT	4	0.585307	0.786567	0.344606
104871	e_gwH.34.98.1	FHA	6	1.05007	2.90286	0.694015
106655	e_gwH.45.68.1	MYB	1	1.72169	2.61876	0.623668
106739	e_gwH.46.36.1	SBP	5	0.785865	2.49184	1.57231
108149	e_gwH.74.33.1	SBP	3	1.05759	0.636253	0.285618
111277	e_gwW.8.20.1	SNF2	1	3.90805	1.72385	0.447869
113031	e_gwW.6.283.1	E2F-DP	6	1.26007	2.14467	0.168229
117655	e_gwW.20.153.1	CCAAT	7	2.84988	1.05165	1.73693
117914	e_gwW.22.121.1	HSF	1	4.10876	1.91489	0.889137
120035	e_gwW.31.178.1	C2C2-Dof	2	0.763815	0.830049	2.08815
121606	e_gwW.50.58.1	SBP	9	0.752377	0.314544	0.692012
126346	estExt_gwp_1H.C_70177	Orphans	10	0.428785	0.811878	1.09806
126810	estExt_gwp_1H.C_30224	CSD	1	6.85804	11.128	3.18168
142283	Chlre2_kg.scaffold_3000256	HMG	9	0.583285	0.495658	0.654969
147286	Chlre2_kg.scaffold_18000211	bZIP	1	2.5021	1.02208	0.430682
147364	Chlre2_kg.scaffold_19000038	CCAAT	2	0.834642	0.716048	2.11217
148821	Chlre2_kg.scaffold_24000220	SBP	5	0.712728	1.02503	2.57597
149159	Chlre2_kg.scaffold_28000107	Orphans	3	0.724528	0.268482	0.282718
151215	Chlre2_kg.scaffold_33000083	HMG	5	0.938635	1.61138	2.05917
152660	Chlre2_kg.scaffold_48000084	Orphans	1	1.12735	1.02361	0.477008
159133	acegs_kg.scaffold_38000029	C2C2-CO-like	7	2.29107	1.30719	1.23594
160281	acegs_kg.scaffold_89000008	FHA	4	0.907589	0.916513	0.411621
166327	fgenesh2_pg.C_scaffold_7000246	SBP	5	0.331823	1.24157	ND
166618	fgenesh2_pg.C_scaffold_5000087	MYB-related	7	5.81815	2.90312	ND
168290	fgenesh2_pg.C_scaffold_4000341	Orphans	3	0.902705	0.828699	0.370488
171833	fgenesh2_pg.C_scaffold_1000454	SBP	1	1.60339	2.0073	1.03964
174174	fgenesh2_pg.C_scaffold_24000249	FHA	2	0.599066	0.397708	0.911077
177618	fgenesh2_pg.C_scaffold_43000072	SNF2	3	1.6854	0.426737	0.4771
179289	fgenesh2_pg.C_scaffold_66000003	C2C2-GATA	4	0.6461	1.08604	0.449293
180245	fgenesh2_pg.C_scaffold_80000049	bZIP	5	0.379242	1.23404	ND
180819	fgenesh2_pg.C_scaffold_111000009	CCAAT	5	0.423561	1.04231	2.392
183777	estExt_fgenesh2_kg.C_10285	bHLH	1	2.13977	4.23982	1.24839
184359	estExt_fgenesh2_kg.C_230055	MYB-related	5	0.627714	7.16803	15.149
186976	estExt_fgenesh2_pg.C_50434	PLATZ	4	0.389047	0.275548	0.167957
187531	estExt_fgenesh2_pg.C_60308	bZIP	4	0.5865	1.17644	0.463547
189373	estExt_fgenesh2_pg.C_140328	PHD	3	1.20499	0.727616	0.452294
189471	estExt_fgenesh2_pg.C_150166	CCAAT	3	1.25614	0.972309	0.447188
189879	estExt_fgenesh2_pg.C_10357	HMG	4	0.631136	0.632089	0.343505
192634	estExt_fgenesh2_pg.C_310136	C3H	1	1.35799	1.15091	0.413509
192899	estExt_fgenesh2_pg.C_330097	HMG	2	0.823451	0.630828	2.6519
193299	estExt_fgenesh2_pg.C_410029	Orphans	7	2.07505	1.20896	1.75428
193681	estExt_fgenesh2_pg.C_450107	PHD	4	0.813236	0.784364	0.441383
194168	estExt_fgenesh2_pg.C_570011	Orphans	6	0.858053	6.33424	0.455064
194555	estExt_fgenesh2_pg.C_690037	C3H	3	0.904651	0.837677	0.385147
195838	FER_fgenesh1_est.C_scaffold_27000019	RWP-RK	4	0.246324	0.385934	0.169866
195840	FER_158808	RWP-RK	3	0.643151	0.346193	0.166138
195860	FER_estExt_fgenesh2_pg.C_260253	RWP-RK	3	2.07106	0.547271	0.350195
195891	FER_158168	RWP-RK	5	0.979645	1.90321	2.67796
195917	FER_171222	RWP-RK	7	2.66389	1.39233	2.48041
195918	FER_rwp13	RWP-RK	4	0.544746	0.809348	0.341931
196759	CNA_query	SNF2	1	2.05655	2.49548	1.00908
ND: Not determined
* Identifiers from JGI genome annotation v.3.1
