# Supplementary material for: Genome-Wide Identification of Regulatory Elements and Reconstruction of Gene Regulatory Networks of the Green Alga Chlamydomonas reinhardtii under Carbon Deprivation
Source: PLoS One. 2013 Nov 1;8(11):e79909. doi: 10.1371/journal.pone.0079909 (PMC3816576; doi:10.1371/journal.pone.0079909)
Supplement: Table S5 — Motifs found in promoter regions of genes regulated by low CO2 and having a close FAIRE peak. Excel file listing the sequences of the motifs found in the promoter regions of genes regulated by low CO2 and having a close FAIRE peak. Protein ID, transcript ID, gene family name, motif identifiers and motif sequences are provided. (XLS) [file pone.0079909.s005.xls]

## Sheet: Table S5
Table S5. Motifs found in promoter regions of genes regulated by low CO2 and having a close FAIRE peak.
Protein ID *	Transcript ID **	MotifID	Motif p-value	Motif left_flank	Motif site	Motif right_flank	Transcript ID *	Gene family
104871	104871	motif_1	9.67e-08	CCGCGCGTGC	CGCAGCTGCTGCGGC	GGCTGGCGCT	e_gwH.34.98.1	FHA
126810	126810	motif_1	2.01e-05	TGGCCTTTCG	AGCATTTGCAGCCGG	GCAGGGCTCT	estExt_gwp_1H.C_30224	CSD
145450	206676	motif_1	6.42e-06	CGGCACCGGC	ATCAGTTGCCGCTGC	ATCGGCATGC	Chlre2_kg.scaffold_14000083	SNF2
148821	195928	motif_1	9.21e-07	CTCGCCACAG	AGGCTCTGCTGGTGC	GGCTGACTTA	Chlre2_kg.scaffold_24000220	SBP
148821	195928	motif_1	9.21e-07	CTCGCCACAG	AGGCTCTGCTGGTGC	GGCTGACTTA	Chlre2_kg.scaffold_24000220	SBP
153371	153371	motif_1	3.85e-08	GCCCGCGCCG	AGCAGCTGCTGCGGC	CGCACACGAC	Chlre2_kg.scaffold_60000060	SET
153371	153371	motif_1	3.85e-08	GCCCGCGCCG	AGCAGCTGCTGCGGC	CGCACACGAC	Chlre2_kg.scaffold_60000060	SET
17550	17550	motif_1	8.78e-06	CCTGCGATAG	CGGCTCCGCTGCCGC	GAACAGTAGG	fgenesh1_pg.C_scaffold_36000015	C2H2
183777	183777	motif_1	4.74e-06	GTCAGCTCCG	CCCAACTGCTGCTGC	GTTTATGTTC	estExt_fgenesh2_kg.C_10285	bHLH
183777	183777	motif_1	4.74e-06	GTCAGCTCCG	CCCAACTGCTGCTGC	GTTTATGTTC	estExt_fgenesh2_kg.C_10285	bHLH
184359	205566	motif_1	2.91e-06	GGTGCTGGTA	CACAGCTGCTGGCGA	GCCCCCGGGT	estExt_fgenesh2_kg.C_230055	MYB-related
184386	184386	motif_1	3.2e-05	TTCCGGCGCG	TTGCGGTGCTGGTGC	TCCGTCGCGA	estExt_fgenesh2_kg.C_280024	HMG
190458	190458	motif_1	1.3e-05	GGCCAAGACA	CGCCGTTGCTGCCAA	CGGTCGGGAG	estExt_fgenesh2_pg.C_190061	Sigma70-like
194168	194168	motif_1	2.96e-08	AACAATCCCC	CGCCGCTGCTGCTGC	TGCCGCTGCT	estExt_fgenesh2_pg.C_570011	Orphans
194555	194555	motif_1	1.59e-06	GTGTGGCGGC	CGCCGCCGCTGCCGC	CGAGCGCTCC	estExt_fgenesh2_pg.C_690037	C3H
195840	195840	motif_1	1.04e-06	AGGACGCGGA	TGCTGCTGCTGCTGC	TATTACTCAT	FER_158808	RWP-RK
195840	195840	motif_1	1.04e-06	AGGACGCGGA	TGCTGCTGCTGCTGC	TATTACTCAT	FER_158808	RWP-RK
195860	195860	motif_1	1.39e-05	GTTCGATAGC	AGGAGCTGCTCGTGG	CATCCGCCTG	FER_estExt_fgenesh2_pg.C_260253	RWP-RK
195891	195891	motif_1	6.85e-07	ACAGTTGGCC	AAGCGCTGCTGCCGC	TCGCCCGCAA	FER_158168	RWP-RK
195891	195891	motif_1	6.85e-07	ACAGTTGGCC	AAGCGCTGCTGCCGC	TCGCCCGCAA	FER_158168	RWP-RK
93505	93505	motif_1	1.69e-07	GTGTACAGCA	AGCAGCTGCTGGGGC	CGGGCACAGC	fgenesh1_est.C_scaffold_5000041	SBP
95196	95196	motif_1	4.79e-09	CCCACGCTGG	AGCAGCTGCTGCCGC	AGTCGGTGGA	fgenesh1_est.C_scaffold_28000028	bZIP
17550	17550	motif_10	3.02e-12	CCCCTCCCAG	CAACAAGTTATCTTTATTA	AAGCAGCTTT	fgenesh1_pg.C_scaffold_36000015	C2H2
195891	195891	motif_10	2.17e-12	CGCAGCAGCT	CAAGAATTTATGATTATAA	TTCTAAGATA	FER_158168	RWP-RK
195891	195891	motif_10	2.17e-12	CGCAGCAGCT	CAAGAATTTATGATTATAA	TTCTAAGATA	FER_158168	RWP-RK
126810	126810	motif_2	1.69e-07	CACAAATATT	TATTAATAAATT	AAAAGCAAAT	estExt_gwp_1H.C_30224	CSD
145450	206676	motif_2	1.69e-07	TGTATGCTTA	AATAAATTATGT	CAGGCTCTTT	Chlre2_kg.scaffold_14000083	SNF2
148821	195928	motif_2	4.93e-08	TGTTTCACAT	AAATAATAATGT	CCTGTTCCCA	Chlre2_kg.scaffold_24000220	SBP
148821	195928	motif_2	4.93e-08	TGTTTCACAT	AAATAATAATGT	CCTGTTCCCA	Chlre2_kg.scaffold_24000220	SBP
153371	153371	motif_2	1.07e-08	TCTGACAACA	AATAAATAATGT	TGCGAGAGCA	Chlre2_kg.scaffold_60000060	SET
153371	153371	motif_2	1.07e-08	TCTGACAACA	AATAAATAATGT	TGCGAGAGCA	Chlre2_kg.scaffold_60000060	SET
17550	17550	motif_2	9.75e-07	TCACAACGTT	AAAAAATGATTT	GGACAGATAA	fgenesh1_pg.C_scaffold_36000015	C2H2
183777	183777	motif_2	3.02e-07	GATGCATAAA	AATTAAGAATGT	TTATGCATTG	estExt_fgenesh2_kg.C_10285	bHLH
183777	183777	motif_2	3.02e-07	GATGCATAAA	AATTAAGAATGT	TTATGCATTG	estExt_fgenesh2_kg.C_10285	bHLH
184386	184386	motif_2	1.6e-06	CAGGTAGCCG	TTTTAATAAACT	GGGTGCAGCC	estExt_fgenesh2_kg.C_280024	HMG
195860	195860	motif_2	5.16e-07	GCCCGATTGA	TATTAGTAAAGT	GTTACTCTTG	FER_estExt_fgenesh2_pg.C_260253	RWP-RK
195891	195891	motif_2	2.02e-06	GCGAATTCGT	ATTAAGTGATGT	TGAACTCGAA	FER_158168	RWP-RK
195891	195891	motif_2	2.02e-06	GCGAATTCGT	ATTAAGTGATGT	TGAACTCGAA	FER_158168	RWP-RK
104871	104871	motif_3	5.94e-06	TCGCGCACAG	ACCATACAAACACA	CCAAATGTAT	e_gwH.34.98.1	FHA
126810	126810	motif_3	5.04e-08	ATAAATTAAA	AGCAAATAAAGACA	CAGAGTCAGC	estExt_gwp_1H.C_30224	CSD
145450	206676	motif_3	4.49e-06	CGGCCAAGTA	ATCGAGCGAATACA	CCCGAAAGCG	Chlre2_kg.scaffold_14000083	SNF2
148821	195928	motif_3	1.82e-07	ACCATCTTCT	AGCAAGCAAATAAA	GGCAACGCTG	Chlre2_kg.scaffold_24000220	SBP
148821	195928	motif_3	1.82e-07	ACCATCTTCT	AGCAAGCAAATAAA	GGCAACGCTG	Chlre2_kg.scaffold_24000220	SBP
17550	17550	motif_3	2.74e-06	AGTTCGCACG	GGCAAGTGAAGAAA	TGCTGAACAC	fgenesh1_pg.C_scaffold_36000015	C2H2
183777	183777	motif_3	5.94e-06	GGAAAATTTT	GCAAAATTAAGATA	GCGTACGCGT	estExt_fgenesh2_kg.C_10285	bHLH
183777	183777	motif_3	5.94e-06	GGAAAATTTT	GCAAAATTAAGATA	GCGTACGCGT	estExt_fgenesh2_kg.C_10285	bHLH
194168	194168	motif_3	3.34e-07	ATCTCAGTTG	AGGAAATTAAAATA	AGGCCCTGGA	estExt_fgenesh2_pg.C_570011	Orphans
194555	194555	motif_3	9.12e-08	TATAACGCGC	AACAAGCTAAAACA	GTATAGTCTG	estExt_fgenesh2_pg.C_690037	C3H
195860	195860	motif_3	1.05e-06	GACCTGACTT	AGCAAGCGAAAATT	AGGTTAAGCT	FER_estExt_fgenesh2_pg.C_260253	RWP-RK
195891	195891	motif_3	3.34e-07	TAATTCTAAG	ATAAATCTAAAACA	AATCCCAGCG	FER_158168	RWP-RK
195891	195891	motif_3	3.34e-07	TAATTCTAAG	ATAAATCTAAAACA	AATCCCAGCG	FER_158168	RWP-RK
93505	93505	motif_3	3.16e-07	AGGTGCGTTG	AGCAATCCAAAACA	GGCTGGGCTG	fgenesh1_est.C_scaffold_5000041	SBP
95196	95196	motif_3	4.77e-09	CAGGGGGGAC	AGCAAGTAAAAACA	TCAACGGTGG	fgenesh1_est.C_scaffold_28000028	bZIP
104871	104871	motif_4	1.14e-10	TGGGTTTGGT	TCAGTTTGGGCTGGTATCTA	CACCCCCCCC	e_gwH.34.98.1	FHA
126810	126810	motif_4	1.2e-07	ACCACTTGAA	CGTCTTTGACGTGGTATAAA	TGCATCTGTC	estExt_gwp_1H.C_30224	CSD
145450	206676	motif_4	6.68e-09	GCGCGGGACT	TCAATTTGGTGTATTATATT	ATCAAATTGT	Chlre2_kg.scaffold_14000083	SNF2
17550	17550	motif_4	4.19e-11	TTGGTTTAGT	TCAGTTTGGGCTGGTAATTA	CAATCCACCC	fgenesh1_pg.C_scaffold_36000015	C2H2
184359	205566	motif_4	1.35e-08	TCCGTCCGAC	TGAGTTTTGGCAGGTTTTTA	ATTGTGAGCC	estExt_fgenesh2_kg.C_230055	MYB-related
194555	194555	motif_4	3.6e-07	TCGATTGACA	CCACTTTGGTATAAAATGGA	GGGGTTTTAA	estExt_fgenesh2_pg.C_690037	C3H
195860	195860	motif_4	1.11e-08	GTGTCGTCTT	TGACTTTGAACTGTATTTAA	GGTTAATGTG	FER_estExt_fgenesh2_pg.C_260253	RWP-RK
195891	195891	motif_4	3.23e-07	CGAAGAAAAG	TTAGCTTGAGCTGATAAACT	GAGGAGGCCA	FER_158168	RWP-RK
195891	195891	motif_4	3.23e-07	CGAAGAAAAG	TTAGCTTGAGCTGATAAACT	GAGGAGGCCA	FER_158168	RWP-RK
95196	95196	motif_4	6.26e-08	CGGTCTGGGC	TGAAATTGGGATTGGATTAA	ACTACAAACT	fgenesh1_est.C_scaffold_28000028	bZIP
104871	104871	motif_5	1.15e-06	GATGGATGCT	TTTTCTCTTG	ATGGCAGTAT	e_gwH.34.98.1	FHA
148821	195928	motif_5	1.15e-06	CCCCCGTTTC	TTTCCTCTTG	CACTCGACCG	Chlre2_kg.scaffold_24000220	SBP
148821	195928	motif_5	1.15e-06	CCCCCGTTTC	TTTCCTCTTG	CACTCGACCG	Chlre2_kg.scaffold_24000220	SBP
183777	183777	motif_5	1.87e-06	CACACGCCCG	TTTCCTGTTG	TATCTTTTCC	estExt_fgenesh2_kg.C_10285	bHLH
183777	183777	motif_5	1.87e-06	CACACGCCCG	TTTCCTGTTG	TATCTTTTCC	estExt_fgenesh2_kg.C_10285	bHLH
93505	93505	motif_5	4.51e-07	TAAACACTCC	TTTCCTTTTG	TCTCCGCAGG	fgenesh1_est.C_scaffold_5000041	SBP
95196	95196	motif_5	4.51e-07	AACTTCCTCT	TTTTCTTTTG	TGCTCTTGCA	fgenesh1_est.C_scaffold_28000028	bZIP
104871	104871	motif_6	2.54e-05	TATTCGCCGG	GTTTGGTGAT	CGCGCACAGA	e_gwH.34.98.1	FHA
126810	126810	motif_6	1.2e-05	CACACCAGCT	GTTTGCTCAT	GCCTTGCCGT	estExt_gwp_1H.C_30224	CSD
145450	206676	motif_6	1.57e-06	GGCCCCCTTA	ATTTGAGGAT	TCGATATCAT	Chlre2_kg.scaffold_14000083	SNF2
148821	195928	motif_6	1.81e-05	CAGATTGACT	ATTTGTGTAT	GCCGTCGCTG	Chlre2_kg.scaffold_24000220	SBP
148821	195928	motif_6	1.81e-05	CAGATTGACT	ATTTGTGTAT	GCCGTCGCTG	Chlre2_kg.scaffold_24000220	SBP
153371	153371	motif_6	1.03e-05	TGGCTGCAGC	ATTTGACGAT	GATGAGGACG	Chlre2_kg.scaffold_60000060	SET
153371	153371	motif_6	1.03e-05	TGGCTGCAGC	ATTTGACGAT	GATGAGGACG	Chlre2_kg.scaffold_60000060	SET
17550	17550	motif_6	5.12e-06	TCGACCCCCT	ATTTGCCCAT	GCCATCCCCC	fgenesh1_pg.C_scaffold_36000015	C2H2
183777	183777	motif_6	4.68e-07	TCATCCCATA	ATTTGCGCAT	TTTGCCCACT	estExt_fgenesh2_kg.C_10285	bHLH
183777	183777	motif_6	4.68e-07	TCATCCCATA	ATTTGCGCAT	TTTGCCCACT	estExt_fgenesh2_kg.C_10285	bHLH
184386	184386	motif_6	6.73e-05	TCCCGTTTGA	ATTTGCCGGT	CTGAAATCTT	estExt_fgenesh2_kg.C_280024	HMG
190458	190458	motif_6	1.26e-06	AGTGTTGAGC	ATTTGAGCAT	TTCCCGCAGT	estExt_fgenesh2_pg.C_190061	Sigma70-like
194168	194168	motif_6	1.5e-05	CTGCTCAAGG	GTTTGGGCAT	CTCAAACTCG	estExt_fgenesh2_pg.C_570011	Orphans
194555	194555	motif_6	2.48e-06	CGATGCAATT	ATTTGCGAAT	CTTCCTTCCT	estExt_fgenesh2_pg.C_690037	C3H
195860	195860	motif_6	2.42e-05	CAGGCGCAGA	GTTTGTTGAT	TACACAGTTG	FER_estExt_fgenesh2_pg.C_260253	RWP-RK
195891	195891	motif_6	4.72e-05	CAACCATGAC	GTATGCGCAT	GCAACGGCAT	FER_158168	RWP-RK
195891	195891	motif_6	4.72e-05	CAACCATGAC	GTATGCGCAT	GCAACGGCAT	FER_158168	RWP-RK
93505	93505	motif_6	7.92e-05	AGCTCGCGTT	ACTTGGGAAT	GCGTTGCGTG	fgenesh1_est.C_scaffold_5000041	SBP
104871	104871	motif_7	6.35e-10	CGGTGGTGGT	GGCGGTGGTGGTGGTGGTG	GACAGGGCGG	e_gwH.34.98.1	FHA
126810	126810	motif_7	3.25e-05	GTGTTTCTTG	GCCGTTTGCGCAGGTCCTT	GTGGCACCCA	estExt_gwp_1H.C_30224	CSD
145450	206676	motif_7	1.83e-07	GGGGCCTGGT	GGCAGTGCTGGCGGTGGTG	CGGCGGGCAG	Chlre2_kg.scaffold_14000083	SNF2
148821	195928	motif_7	4.57e-07	TGTGTATGCC	GTCGCTGGGCATGCTGCTG	ACAGAAACTG	Chlre2_kg.scaffold_24000220	SBP
148821	195928	motif_7	4.57e-07	TGTGTATGCC	GTCGCTGGGCATGCTGCTG	ACAGAAACTG	Chlre2_kg.scaffold_24000220	SBP
153371	153371	motif_7	6.53e-06	GCGGGGGCGG	GGCAGAGGCCGTGGTCGGG	GGCGGGGCCG	Chlre2_kg.scaffold_60000060	SET
153371	153371	motif_7	6.53e-06	GCGGGGGCGG	GGCAGAGGCCGTGGTCGGG	GGCGGGGCCG	Chlre2_kg.scaffold_60000060	SET
17550	17550	motif_7	2.94e-07	GCGAGCCGGG	GGCAGAGGCGGTGGTGGAG	GAGGCATCTT	fgenesh1_pg.C_scaffold_36000015	C2H2
183777	183777	motif_7	2.77e-06	GCACTGCAAC	GTGGCTGCTGGTGGTGGGG	GACAAGGCAG	estExt_fgenesh2_kg.C_10285	bHLH
183777	183777	motif_7	2.77e-06	GCACTGCAAC	GTGGCTGCTGGTGGTGGGG	GACAAGGCAG	estExt_fgenesh2_kg.C_10285	bHLH
184359	205566	motif_7	4.57e-07	GTCAGCACAA	GGCGCTGTTGAAGGTGCAT	ACAGGTGCTT	estExt_fgenesh2_kg.C_230055	MYB-related
184386	184386	motif_7	1.37e-06	AAAAGGTGCA	GCCACACGGGAAGCTGCTG	GCGTCGACCC	estExt_fgenesh2_kg.C_280024	HMG
190458	190458	motif_7	5.63e-06	ACGTCCGAGG	AGAACTGCTGGAGCTACTG	TAGGGATCAG	estExt_fgenesh2_pg.C_190061	Sigma70-like
194168	194168	motif_7	2.07e-07	TGCTGCTGCT	GCCGCTGCTGCTGCTGCTG	CTGCTGCTGC	estExt_fgenesh2_pg.C_570011	Orphans
194555	194555	motif_7	1.29e-05	GTCCATGTCG	GGGACTCGGGGTGGGCGTG	GCTGGTGGCC	estExt_fgenesh2_pg.C_690037	C3H
195840	195840	motif_7	4.27e-09	GGCAGCCAGC	GGCACTGGTGTTGGTGGTG	GTGTTGGTGG	FER_158808	RWP-RK
195840	195840	motif_7	4.27e-09	GGCAGCCAGC	GGCACTGGTGTTGGTGGTG	GTGTTGGTGG	FER_158808	RWP-RK
195860	195860	motif_7	1.65e-06	CACGTGTGAG	GCAGGTGGGCAAGGTGCAG	TGCTGCCTGG	FER_estExt_fgenesh2_pg.C_260253	RWP-RK
195891	195891	motif_7	1.46e-05	TGCCGAAAGA	GGAACTGGAGAATGTCGAC	GTAACTGGCC	FER_158168	RWP-RK
195891	195891	motif_7	1.46e-05	TGCCGAAAGA	GGAACTGGAGAATGTCGAC	GTAACTGGCC	FER_158168	RWP-RK
93505	93505	motif_7	2.34e-06	CGTGCGGCGT	GGCGCTGGGGCATGTCCTC	TTTGGCACGG	fgenesh1_est.C_scaffold_5000041	SBP
95196	95196	motif_7	1.03e-06	TGGACGCGGT	GGCGGACCTCGAGGTGCTG	GGTGAGTGCG	fgenesh1_est.C_scaffold_28000028	bZIP
104871	104871	motif_8	1.04e-07	ATGTGTGGCT	CTCCTTAGCCATGAAACAT	GACTTTACAA	e_gwH.34.98.1	FHA
153371	153371	motif_8	8.36e-08	GGAGCTTAAT	CTCACCACCCTTGTGCAGT	CGCTCAAAAA	Chlre2_kg.scaffold_60000060	SET
153371	153371	motif_8	8.36e-08	GGAGCTTAAT	CTCACCACCCTTGTGCAGT	CGCTCAAAAA	Chlre2_kg.scaffold_60000060	SET
17550	17550	motif_8	1.11e-11	AATCATCGCT	CTCATCAGCCTTGTACCAT	TATCCCCCAG	fgenesh1_pg.C_scaffold_36000015	C2H2
184359	205566	motif_8	9e-08	GCTGAATACC	CTCAGCAGCTGTAAATCAT	TTGCACCAGC	estExt_fgenesh2_kg.C_230055	MYB-related
184386	184386	motif_8	2.66e-08	CCCCGGTGGG	CTCTTCATGTTTGTGACGT	CCCAGGCGAC	estExt_fgenesh2_kg.C_280024	HMG
190458	190458	motif_8	2.05e-07	CCTTTAGTTG	CGTATCAGTCGTGGGCAAT	TGTAGAAGAC	estExt_fgenesh2_pg.C_190061	Sigma70-like
194168	194168	motif_8	1.25e-08	GAGGAGAGAT	GTCTTCAGGCGTGTGTCAT	CCGCTACTGC	estExt_fgenesh2_pg.C_570011	Orphans
195860	195860	motif_8	2.74e-09	GTGATGATCA	CTGATCAGGCGTGAGCCAT	GATCGGATGC	FER_estExt_fgenesh2_pg.C_260253	RWP-RK
93505	93505	motif_8	4.11e-08	GTCCTGCAGC	CGCATCATCCGTGTGCGGT	TCGATGAGGT	fgenesh1_est.C_scaffold_5000041	SBP
104871	104871	motif_9	2.62e-09	TGGGCCCGCA	GGCGACGGGGCCGCAGGCGC	CGGCCCCCCC	e_gwH.34.98.1	FHA
145450	206676	motif_9	1.23e-06	TCGGCGCATC	GGCGACCCAGCCATCAGTGC	GGGTTCGTCG	Chlre2_kg.scaffold_14000083	SNF2
148821	195928	motif_9	1.45e-06	ACAAAGCGTC	GCCGGCCGAGCTGGCCGCGC	AAACCATCTT	Chlre2_kg.scaffold_24000220	SBP
148821	195928	motif_9	1.45e-06	ACAAAGCGTC	GCCGGCCGAGCTGGCCGCGC	AAACCATCTT	Chlre2_kg.scaffold_24000220	SBP
153371	153371	motif_9	1.42e-07	CGCAGCGACA	GGCTGCGCAGCATCAGGCGC	AACAGGCATC	Chlre2_kg.scaffold_60000060	SET
153371	153371	motif_9	1.42e-07	CGCAGCGACA	GGCTGCGCAGCATCAGGCGC	AACAGGCATC	Chlre2_kg.scaffold_60000060	SET
17550	17550	motif_9	1.9e-07	ACAGTAGGTA	GGCGGTGGCGGCGGCGGCGC	TGCCCTGCTT	fgenesh1_pg.C_scaffold_36000015	C2H2
184359	205566	motif_9	1.9e-07	GCTCCCTTGA	GGCGGCGGCGCTATCCACGC	ATGCTTTTTT	estExt_fgenesh2_kg.C_230055	MYB-related
190458	190458	motif_9	1.45e-06	GGCCTCTGCC	GGCTAGGTGGGCACACACGC	TTCTGACACG	estExt_fgenesh2_pg.C_190061	Sigma70-like
194168	194168	motif_9	7.45e-07	TGCTGCTGCT	GCCGCCGGCGGCGCAGGTGC	GGGCCGTGGA	estExt_fgenesh2_pg.C_570011	Orphans
195840	195840	motif_9	8.93e-10	CCATCGGCCT	GGCGGCGCCGCCGCACGCGC	TGCTCCCGCA	FER_158808	RWP-RK
195840	195840	motif_9	8.93e-10	CCATCGGCCT	GGCGGCGCCGCCGCACGCGC	TGCTCCCGCA	FER_158808	RWP-RK
195860	195860	motif_9	4.58e-08	CGCCTTCGTG	GGCGGGGCAGGCACAGGCGC	AGAGTTTGTT	FER_estExt_fgenesh2_pg.C_260253	RWP-RK
195891	195891	motif_9	1.61e-06	CAGCCTGTCG	GGCTTCGCGTCAGCAGGCGC	CGGCCAGCAG	FER_158168	RWP-RK
195891	195891	motif_9	1.61e-06	CAGCCTGTCG	GGCTTCGCGTCAGCAGGCGC	CGGCCAGCAG	FER_158168	RWP-RK
93505	93505	motif_9	1.58e-07	CGTCGCACCC	GGCTACGGCGCCAGCCATGC	CGGGAACGGC	fgenesh1_est.C_scaffold_5000041	SBP
95196	95196	motif_9	1.35e-08	TGACGCCGAT	GGCGGCGGCGGCGGCGGCGC	CGGCTCCGAC	fgenesh1_est.C_scaffold_28000028	bZIP
* Identifiers from JGI genome annotation v.3.1
** Identifiers from JGI genome annotation v.4
