# Supplementary material for: Genome-Wide Identification of Regulatory Elements and Reconstruction of Gene Regulatory Networks of the Green Alga Chlamydomonas reinhardtii under Carbon Deprivation
Source: PLoS One. 2013 Nov 1;8(11):e79909. doi: 10.1371/journal.pone.0079909 (PMC3816576; doi:10.1371/journal.pone.0079909)
Supplement: Table S7 — Sequence motifs found in the Lcr1 and Lcr2 promoters. Excel file listing the sequences of the motifs found in the promoter regions of Lcr1 (protein ID 184359) and Lcr2 (protein ID 188627). Protein ID, gene name, motif identifiers, motif sequences, and motif and MAST scores are provided. (XLS) [file pone.0079909.s007.xls]

## Sheet: Table S7
Table S7. Sequence motifs found in the Lcr1 and Lcr2 promoters.
Protein ID *	Motif	Motif p-value	Left flank	Motif site	Righ flank	Motif pattern	MAST position p-value
188627	1	2.24e-12	AAATCGATTC	AAGTGCATAAAAAGCATACA	TGTATGCACT	AA[AG]T[GT][CG]A[GT]AAA[AC]AGCAT[AG]CA	4.8 e-11
184359	1	6.17e-12	GCGTCAACTG	AAATTGAGAAACAGCATGCA	CACACGCTTT	AA[AG]T[GT][CG]A[GT]AAA[AC]AGCAT[AG]CA	8.7 e-11
184359	2	8.2e-07	AGCATACACC	AAAATCTAT	TCGCCTTGAA	AAAATC[GT]AT	> 0.0001
188627	2	2.01e-06	TGACAAAGAG	AAAATCGAT	TCAAGTGCAT	AAAATC[GT]AT	> 0.0001
188627	3	2.29e-08	GGCCGCATGT	TCATTTGCATCA	TCGCGCTCAT	TCATTTGCA[CT]CA	8.2 e-08
184359	3	5.29e-08	CAGCTGTAAA	TCATTTGCACCA	GCATACACCA	TCATTTGCA[CT]CA	1.5 e-07
188627	4	9.05e-12	GGCCTTGGAC	ATAACTCGTTAAAACCCAAA	GGCCGCCCCA	AT[AG]AC[AT][AC][GT][GT]TA[AC]AACC[AC]A[AC]A	2.3 e-10
184359	4	1.77e-11	AGTTTCGTGC	ATGACAATGTACAACCAACA	GGCGGGAAGG	AT[AG]AC[AT][AC][GT][GT]TA[AC]AACC[AC]A[AC]A	3.3 e-10
184359	5	4.26e-09	AGGACATTGA	ATTACCAAGGAGAA	TGCCAATAAT	ATTACCA[AT]G[GT]AG[AC]A	7.2 e-05
188627	5	6.92e-09	CGTGGCGTTC	ATTACCATGTAGCA	GCCGCCGAAA	ATTACCA[AT]G[GT]AG[AC]A	3.3 e-08
184359	6	1.24e-06	CACACACGCT	TTCATAACT	TGGGTTACCG	TTCA[CT]AACT	> 0.0001
188627	6	2.87e-06	CCCTGCTTCG	TTCACAACT	CCACATCCGC	TTCA[CT]AACT	> 0.0001
184359	7	1.81e-05	ACTTCCGCCT	AATACAA	TCCGCCTCCC	AA[GT]ACAA	> 0.0001
188627	7	4.44e-05	GCGCCAGTTG	AAGACAA	CTTTGCTAAA	AA[GT]ACAA	> 0.0001
184359	8	1.58e-08	GTAATATTTG	CAGTAATAGGCAC	AATCACTTAT	CAG[GT]AATAGG[CT]AC	3.1 e-05
188627	8	2.57e-08	CCATCCCTGC	CAGGAATAGGTAC	GCGGGCTGCC	CAG[GT]AATAGG[CT]AC	4.9 e -08
184359	9	2.63e-06	TCGTCCGCTA	TGAAGTCCA	TCCTTCATCG	TGAAGTCCA	> 0.0001
188627	9	2.63e-06	CTGATACTTC	TGAAGTCCA	CTTCTACTCA	TGAAGTCCA	> 0.0001
184359	10	3.05e-05	GTGTAAGGGC	CATTGAA	CGACTGCATT	CATTGAA	> 0.0001
188627	10	3.05e-05	GGAACGCCGT	CATTGAA	GCGAACACAT	CATTGAA	> 0.0001
* Identifiers from JGI genome annotation v.3.1
